1 **Whole-genome sequencing analysis reveals the population history of *Mus musculus* in**  
2 **Madagascar**

3

4 Kazumichi Fujiwara<sup>1</sup>, Marie C Ranoroosa<sup>2</sup>, Satoshi D Ohdachi<sup>3,4</sup>, Satoru Arai<sup>5</sup>, Yuki Sakuma<sup>4</sup>, Hitoshi  
5 Suzuki<sup>4</sup>, Naoki Osada<sup>1,\*</sup>

6

7 <sup>1</sup>Graduate School of Information Science and Technology, Hokkaido University, Sapporo, 060-0814,  
8 Japan

9 <sup>2</sup>Ecole supérieur des Sciences Agronomiques ,Université d'Antananarivo, Antananarivo, 101,  
10 Madagascar

11 <sup>3</sup> Institute of Low Temperature Science, Hokkaido University, Sapporo, 060-0819, Japan

12 <sup>4</sup>Graduate School of Environmental Science, Hokkaido University, Sapporo, 060-0810, Japan

13 <sup>5</sup>Center for Surveillance, Immunization, and Epidemiologic Research, National Institute of Infectious  
14 Diseases, Toyama 1-23-1, Shinjuku, Tokyo 162-8640, Japan

15

16 \*Correspondence to:

17 Naoki Osada, [nosada@ist.hokudai.ac.jp](mailto:nosada@ist.hokudai.ac.jp)

18

19 Word count for main text (excluding references, tables, and figures): 5,030 words

20 **Abstract**

21 In Madagascar, the house mouse (*Mus musculus*) is thought to have colonized along with  
22 humans and is now one of the most successfully colonized rodents on the island. In this study, we  
23 determined the whole-genome sequences of the Madagascar house mouse captured from the wild. We  
24 examined the evolutionary history of its population regarding the mitochondrial and autosomal  
25 genomes. We confirmed that in the mitochondrial genomes of Madagascar house mice, a monophyletic  
26 clade forms a basal origin within the species. An analysis of autosomal genomic sequences indicates  
27 that the Madagascar house mouse population is genetically a member of *M. m. castaneus* (CAS). It  
28 also contains genetic elements of *M. m. domesticus* (DOM) resulting from ancient hybridization. The  
29 signature of a strong population bottleneck 1000–3000 years ago was observed in the mitochondrial  
30 and autosomal genomic data. We also show that the divergence of the Madagascar population from  
31 the CAS population occurred approximately 50,000–99,000 years ago. Madagascar house mice show  
32 strong genetic affinity to many CAS samples across a wide range of Indian Ocean coastal regions.  
33 However, our results suggest that they would not have originated directly from the Indonesian islands,  
34 where Austronesian-speaking people in Madagascar originated. Because the ancient hybridization  
35 signature with DOM did not appear in the Indonesian and other CAS samples, we propose that  
36 Madagascar house mice were not directly brought by Austronesian-speaking people but came from  
37 somewhere around the Middle East or South Asia soon after the colonization of initial farmers.

## 38 Introduction

39 The house mouse (*Mus musculus*) originated from the northern part of the Indian subcontinent  
40 (Boursot *et al.*, 1996; Din *et al.*, 1996) and is a rodent that has exploded in population size and  
41 successfully colonized a wide range of continents, large islands, and even small remote islands around  
42 the world. Hypothetically, there are three major subspecies of house mice: the South Asian subspecies  
43 (*M. m. castaneus*: CAS), the North Eurasian subspecies (*M. m. musculus*: MUS), and the West  
44 European subspecies (*M. m. domesticus*: DOM). Rodents, such as mice and rats, are small commensal  
45 mammals that spread worldwide along with humans. Therefore, analyzing murine colonization  
46 patterns would provide insight into the history of human migration (Prager *et al.*, 1998; Duplantier *et*  
47 *al.*, 2002; Searle *et al.*, 2009; Suzuki *et al.*, 2013, 2015; Jing *et al.*, 2014; Phifer-Rixey *et al.*, 2018; Li  
48 *et al.*, 2021).

49 Madagascar is the fourth largest island in the world. It separated from the African continent  
50 around 160 million years ago and is about 300 km from the coast of the African continent at its shortest  
51 distance. The origin of humans living on the island of Madagascar, inferred from linguistic (Dahl, 1951,  
52 1988; Adelaar, 1995), archaeological (Dewar and Wright, 1993; Burney *et al.*, 2004), and genetic  
53 (Hurles *et al.*, 2005) evidence, appears to be a dual origin from East Africa and Southeast Asia (in  
54 particular, Borneo Island). In addition, archaeological evidence suggests that the earliest human  
55 settlement occurred approximately 1500–2000 years ago (MacPhee and Burney, 1991; Burney *et al.*,  
56 2004). However, recent archaeological excavations suggest a human presence on the island of  
57 Madagascar much earlier than previously thought (Dewar *et al.*, 2013; Hansford *et al.*, 2018; Douglass  
58 *et al.*, 2019) but it remains an open question. More recently, studies using the human genome showed  
59 that they migrated from Borneo approximately 2000–3000 years ago and from the east coast of Africa  
60 around 1500 years ago (Pierron *et al.*, 2017). Subsequent intermittent human settlement on the island  
61 of Madagascar led to forming a large human population on the entire island approximately 1000 years  
62 ago (Battistini and Verin, 1972; Burney *et al.*, 2004). At that time, a large commercial network

63 connecting Asia and the Mediterranean Sea had formed along the coastal regions of the Indian Ocean  
64 (Verin and Wright, 1999), and traders from the Arabian Peninsula also sailed to the coast of Africa,  
65 including Madagascar (Allibert, 1988; Liszkowski, 2000).

66 Rodents have successfully colonized the Madagascar island, and there are at least 23 species  
67 of rodents currently inhabiting it today (Rakotondravony and Randrianjafy, 1998). Of these, the black  
68 rat (*Rattus rattus*) is the most abundant rodent on the island (Goodman, 1995), whereas the house  
69 mouse is found in human settlements all over the island, though it is less abundant than the black rat.  
70 In a previous study analyzing limited mitochondrial control regions, the cytochrome *b* gene, and  
71 flanking tRNAs, Madagascar house mice were genetically similar to samples from Yemen, in the  
72 southern part of the Arabian Peninsula (Duplantier *et al.*, 2002; Sakuma *et al.*, 2016). The mtDNA  
73 analysis revealed that the Yemeni house mouse mtDNA lineage forms a cluster of another potential  
74 subspecies, *M. m. gentilulus* (GEN), which is distinct from the three major subspecies (Prager *et al.*,  
75 1998; Suzuki *et al.*, 2013). The mtDNA lineage in Madagascar constitutes a “narrow” monophyletic  
76 group, suggesting a recent and probably single origin (Duplantier *et al.*, 2002; Sakuma *et al.*, 2016).  
77 Suzuki *et al.* (2013) further showed that the Madagascar-Yemen mitochondrial lineage was in the most  
78 basal place to *M. musculus*. In contrast, microsatellite studies suggested that the Madagascar mouse is  
79 CAS (Hardouin *et al.*, 2015), and the phenotype of the Madagascar house mouse shows that the tail is  
80 as long as the head and body (Rakotondravony and Randrianjafy, 1998), which is a characteristic of  
81 DOM (Orsini *et al.*, 1983; Marshall, 1998).

82 Previous studies on the genetic background of the house mouse in Madagascar are primarily  
83 based on mtDNA with limited nuclear genome analysis. This study performed high-quality whole-  
84 genome sequencing of five wild-caught *M. musculus* samples from the Madagascar islands. Although  
85 the whole-genome sequences of wild mice in European and Asian regions have been partly presented  
86 in previous studies (Harr *et al.*, 2016; Fujiwara *et al.*, 2021), there are still many undefined regions  
87 throughout the world. We determined the genetic position of these Madagascar wild house mice within

88 the global population of *M. musculus*. We estimated the divergence time resulting from the  
89 colonization of these wild mice in Madagascar to determine their genetic backgrounds and population  
90 dynamics. Our results shed light on the prehistoric and migration history of house mice and humans in  
91 Madagascar.

## 92 **Materials and Methods**

### 93 *Materials*

94 Five specimens of the Madagascar wild house mouse were collected from the Parc Botanique  
95 et Zoologique de Tsimbazaza, Madagascar, which were also analyzed in the study by Sakuma et al.  
96 2016 (Sakuma *et al.*, 2016). The other genomic sequence data of *M. musculus* were obtained from  
97 previous studies (Harr *et al.*, 2016; Fujiwara *et al.*, 2021). We used seven samples from the western  
98 Mediterranean mouse (*Mus spretus*) obtained from publicly available data (Harr *et al.*, 2016). These  
99 publicly available data were downloaded from the DDBJ (PRJDB11027) and the European Nucleotide  
100 Archive (PRJEB9450, PRJEB11742, PRJEB14167, PRJEB2176, and PRJEB11897), representing the  
101 data of Fujiwara et al. (2021) and Harr et al. (2016), respectively. The *M. spretus* samples were used  
102 for the outgroup population for downstream analysis. The complete mitochondrial sequence of *M.*  
103 *spretus* (NC\_025952) was added for the mitochondrial lineage analysis. See Supplementary Table 1  
104 for detailed information on the samples used in this study.

### 105 *Mapping genomic reads and variant calling*

106 For the five Madagascar wild house mouse samples, paired-end reads 150 bp in length were  
107 generated by using the DNBSEQ platform. The cleaned reads were quality checked by the FastQC  
108 tool (Andrews, 2010). The basic strategy for mapping genomic read pairs and single-nucleotide variant  
109 (SNV) calling was identical to that described in Fujiwara et al. (2021). The autosomal SNVs were  
110 filtered by Variant Quality Score Recalibration and Mappability unique scores (Pockrandt *et al.*, 2020)  
111 as described in Fujiwara et al. (2021). The mitochondrial genome sequences of the Madagascar mouse  
112 samples were reconstructed by a *de-novo* assembly software, Novoplasty v.4.2.1 (Dierckxsens *et al.*,  
113 2017), using the house mouse mitochondrial genome (NC\_005089) as a seed sequence. To distinguish  
114 the sex of the samples, we calculated the read coverages on the sex chromosomes. We used “depth”  
115 command from samtools to count the coverage of each sample in non-pseudoautosomal sites of the X  
116 and Y chromosomes that passed the mappability filter. The ratio of X to Y chromosome coverages

117 exhibited a clear bimodal distribution in which the modes were 1.03–1.09 and 148.24–268.16. Three  
118 out of five samples with the higher ratios were judged as male samples (Supplementary Table 2). The  
119 synonymous and nonsynonymous SNVs were annotated with the house mouse gene annotation data  
120 version GRCm38.101 ([ftp://ftp.ensembl.org/pub/release-101/gtf/mus\\_musculus/](ftp://ftp.ensembl.org/pub/release-101/gtf/mus_musculus/)) using the SnpEff  
121 and SnpSift programs (Cingolani, Patel, *et al.*, 2012; Cingolani, Platts, *et al.*, 2012). All Madagascar  
122 wild house mouse samples were examined for kinship using KING software (Manichaikul *et al.*, 2010)  
123 with the option “--kinship.” None of the samples from Madagascar showed a kinship relationship.  
124 Therefore, a total of 133 samples of mice, five novel samples from Madagascar, and 128 publicly  
125 available samples, were used in this study.

#### 126 *Mitochondrial lineage analysis*

127 For mitochondrial genome analysis, *M. spretus* was used for the outgroup. The mitochondrial  
128 sequences of all samples were aligned using MUSCLE (Edgar, 2004a, 2004b) implemented in MEGA7  
129 (Kumar *et al.*, 2016), and all D-Loop regions and gapped sites were removed. To construct the  
130 maximum likelihood (ML) tree of the mitochondrial genome, we used IQ-TREE v.1.6.12 (Nguyen *et al.*  
131 *et al.*, 2015). We also estimated the best substitution model using the ModelFinder (Kalyaanamoorthy *et al.*  
132 *et al.*, 2017) function implemented in IQ-TREE and used the “TIM2+F+R3” model for our calculations.  
133 The bootstrapping values were also computed with 1000 replications for constructing ML trees. We  
134 used the program, BEAST v1.8.4 (Drummond and Rambaut, 2007) to estimate the time to most recent  
135 common ancestors (tMRCA) using mitogenome sequences (16,038 bp), the HKY+G substitution  
136 model, and the strict clock model as reported previously (Li *et al.*, 2021). The Markov chain Monte  
137 Carlo simulation was run for 10 million generations (burn-in 10%) and sampled every 10,000  
138 generations. Tracer v1.6 software (Rambaut *et al.*, 2018) was used to assess the convergence of the  
139 chains and ensured effective sample size (ESS) values above 200 for most parameters. The trees were  
140 summarized using TreeAnnotator v1.8.4 software (<http://beast.community/treeannotator>) with the  
141 settings “Maximum clade credibility tree” and “Mean heights” and were displayed using FigTree

142 v1.4.3 software (<http://tree.bio.ed.ac.uk/software/figtree/>). The time-dependent evolutionary rates of  
143 mtDNA (Ho *et al.*, 2011) were considered as previously described (Li *et al.*, 2021). The evolutionary  
144 rates of  $2.4 \times 10^{-8}$  substitutions/site/year and  $1.1 \times 10^{-7}$  substitutions/site/year were used for the older  
145 (> 100,000 years) and younger divergences (< 20,000 years ago), respectively.

#### 146 *Population structure analysis of the Madagascar house mouse*

147 We performed SNV filtering by using vcftools omitting indels and multiallelic SNVs for  
148 downstream analysis. The data for filtered SNVs, which contain only biallelic autosomal SNVs, were  
149 then converted to a PLINK (Purcell *et al.*, 2007) format. In general practice, the SNVs in linkage  
150 disequilibrium are excluded from the population structure analysis. However, these SNVs were not  
151 excluded in this study because the house mouse samples were highly structured at the subspecies level,  
152 and excluding these SNVs would result in a very small number of SNVs left for analysis.

153 Principal component analysis (PCA) was performed using the “smartpca” program  
154 implemented in Eigensoft (Patterson *et al.*, 2006). In order to calculate eigenvalues, the default  
155 parameter settings for smartpca were used, that we did not remove outlier samples.

156 The  $f_4$ -statistics were computed using the AdmixTools (Patterson *et al.*, 2012) qpDstat  
157 program with “f4 mode” and “printsd” options. The representative CAS and DOM populations were  
158 the least admixed samples of Indian CAS and German DOM, as chosen in the previous study (Fujiwara  
159 *et al.*, 2021). The configuration of the  $f_4$ -statistics is represented as  $f_4(A, B; C, D)$ , where “A” to “D”  
160 represents each population. If the value of  $f_4(A, B; C, D)$  is not statistically significantly different from  
161 0, the allele frequency difference between A and B would be independent on the allele frequency  
162 difference between C and D. In contrast, if the value of  $f_4(A, B; C, D)$  is statistically significantly  
163 positive, the gene flow may exist between A and C or B and D. Furthermore, if the value of  $f_4(A, B; C,$   
164  $D)$  is statistically significantly negative, the gene flow may exist between A and D or B and C. The  
165 outgroup  $f_3$ -statistics were computed by the qp3pop program of AdmixTools using the “outgroupmode”  
166 option. In the outgroup  $f_3$ -statistics scenario, the statistics of  $f_3(A, B; C)$ , with target C as an outgroup



167 population, show the genetic drift from C to the common ancestor of A and B, and reveal the closeness  
168 between the population A and B.

169 A neighbor-joining tree was constructed for autosomes according to a pairwise distance matrix.  
170 Intermediate hybrid samples are excluded for computing distance matrix and constructing neighbor-  
171 joining tree, because they significantly change the topology of the phylogenetic tree. This sample  
172 exclusion condition is according to the method described by Fujiwara et al. (2021) (Fujiwara *et al.*,  
173 2021). We computed all pairwise identity-by-state (IBS) distance matrices by using PRINK1.9  
174 software using the "--distance square 1-ibs" option (Purcell *et al.*, 2007). To construct and visualize a  
175 neighbor-joining tree (Saitou and Nei, 1987) from the distance matrix, we used the "ape" package in  
176 R (Paradis *et al.*, 2004). The Neighbor-Net tree (Bryant and Moulton, 2004) was computed using  
177 gdsfmt, SeqArray, SNPRelate (Zheng *et al.*, 2012, 2017), and phangorn (Schliep, 2011) packages in  
178 R.

#### 179 *Demographic inference analysis*

180 Pairwise sequentially Markovian coalescent (PSMC) analysis was performed for the samples  
181 (Li and Durbin, 2011). To obtain the consensus autosomal genome sequences of individual samples,  
182 the "mpileup" command from samtools was used with the "-C 50, -O, -D 60, -d 10" option as the input  
183 file for PSMC. The PSMC command option values (-t and -p) were considered according to the default  
184 settings suggested by the PSMC software. The time interval parameters were set to "4+25\*2+4+6"  
185 with 25 iterations. The value,  $0.57 \times 10^{-8}$  per site per generation, were used for the mutation rate, and  
186 we set generation time as 1 year (Milholland *et al.*, 2017). To validate the variance of estimated  
187 population size,  $N_e$ , we performed 100 bootstrap replications for each representative subspecies sample.

188 The multiple sequentially Markovian coalescent (MSMC) (Schiffels and Durbin, 2014) and  
189 its second version (MSMC2: <https://github.com/stschiff/msmc2>) (Malaspinas *et al.*, 2016; Schiffels  
190 and Wang, 2020) were used to estimate  $N_e$  changes and population separation history. In our  
191 MSMC/MSMC2 analysis, we performed estimations using a phased haplotype sequence as input data.

192 For phasing, ShapeIt4 software (Delaneau *et al.*, 2019) was used to generate phased haplotype data.  
193 The “Mapping Data for G2F1 Based Coordinates” (Liu *et al.*, 2014) from “Mouse Map Converter  
194 (<http://cgd.jax.org/mousemapconverter/>)” was downloaded to provide the recombination rate input file  
195 for MSMC/MSMC2. Mappability of the reference mouse genome is considered, and only unique  
196 sequence positions were used in the calculations (Fujiwara *et al.*, 2021). To estimate the population  
197 separation history for CAS and Madagascar, or DOM and Madagascar, we used two haplotypes from  
198 each population (four haplotypes total) to calculate the relative cross coalescent rate (rCCR) for given  
199 population pairs. According to Schiffels *et al.* (2014) (Schiffels and Durbin, 2014), the rCCR variable  
200 ranges between 0 and 1 (in some cases it is unavoidable to calculate greater than 1), and the value close  
201 to 1 indicates that two populations were not differentiated. Heuristically, the half value of rCCR (i.e.,  
202  $rCCR = 0.5$ ) is assumed as the time when the two populations separated. In the bootstrapping method  
203 of MSMC2, the original input data was cut into blocks of 5Mbp each, which were then randomly  
204 sampled to create a 3Gbp-length pseudo genome. Calculations were performed on a total of 20 of these  
205 pseudo genomes. For the Madagascar house mouse samples, we used all five individuals (ten  
206 haplotypes) for estimating the effective population size using MSMC to clarify the recent bottleneck  
207 event. To visualize the MSMC/MSMC2 data, we assumed a generation time of 1 year and a mutation  
208 rate of  $0.57 \times 10^{-8}$  per site per generation (Milholland *et al.*, 2017).

209 The demographic parameter estimation was performed using the composite likelihood method  
210 as implemented in FastSimCoal2 (Excoffier *et al.*, 2013). To reduce the effect of natural selection,  
211 exonic and flanking regions within 10 kb from exons were excluded from our analysis. The sites used  
212 in this analysis included a total of 469,631,319 sites. We measured joint minor allele frequencies of  
213 CAS-Madagascar and DOM-Madagascar populations and used the data for estimation. For each model,  
214 we simulated 100,000 genealogies and ran 40 expectation-maximization cycles. We repeated the above  
215 process 1000 times with different seed values and adopted the demographic parameters with the  
216 highest log-likelihood. Bootstrapping for FastSimCoal2 is demonstrated by 100 replicates of the

217 highest ML model parameters. The confidence interval for each demographic parameter is calculated  
218 based on the bootstrapping results. We used the same values of mutation rate and generation time as  
219 the MSMC/MSMC2 analysis.

## 220 **Results**

### 221 *Genetic diversity of Madagascar *Mus musculus**

222 We analyzed five whole-genome sequences of *M. musculus* from the Madagascar island. The  
223 samples were collected from the Parc Botanique et Zoologique de Tsimbazaza, Madagascar, and  
224 nearby areas in 2015 (Sakuma *et al.*, 2016). We also used the 128 whole-genome sequences of *M.*  
225 *musculus* from previous studies (121 samples of *M. musculus*, 7 samples of *M. spretus*). Supplementary  
226 Table 1 contains a list of samples with sample ID and locations used in this study. The number of  
227 filtered SNVs in five Madagascar house mouse samples against the GRCm38 (C57BL/6J) reference  
228 genome was 24,883,782 in total with an overall transition/transversion ratio of 2.10. The average per-  
229 sample nucleotide diversity (heterozygosity) of the Madagascar sample was 0.0031. Table 1 presents  
230 the detailed metrics for each mouse sample.

### 231 *Present population structure analysis*

232 To define the genetic features of the Madagascar house mouse population, we first performed  
233 a PCA using autosomal 86,288,314 SNVs from 126 *M. musculus* samples (Figure 1). In the PCA plot,  
234 three clusters corresponding to MUS, CAS, and DOM genetic components, and individuals lie on the  
235 intermediate shows inter-species hybrid samples. The PC1 (eigenvector 1) indicates the genetic  
236 difference between MUS and CAS, and the PC2 (eigenvector 2) indicates the genetic difference  
237 between the DOM and CAS. The five Madagascar samples positioned near the CAS cluster revealed  
238 a slightly admixed genetic component of the DOM. There was little variation in eigenvalues among  
239 the Madagascar mouse population. Next, we constructed an autosomal genetic tree using the neighbor-  
240 joining method with the *M. spretus* population set as the outgroup (Figure 2). The tree showed that the  
241 Madagascar population formed a single cluster within the CAS cluster. Neighboring samples of the  
242 Madagascar samples were the Nepalese samples and the Indian samples except for the mountainous  
243 areas. Although the Madagascar samples were close to the Indonesian samples in the PCA plot, the  
244 tree showed that the samples in the two populations belonged to different clusters within the CAS

245 clade. Furthermore, we constructed a Neighbor-Net network by using the genetic distances of all  
246 samples (Supplementary Figure 1). The Neighbor-Net network showed similar results to the neighbor-  
247 joining tree, showing that the Madagascar wild house mouse samples are within the CAS samples  
248 clusters. Fujiwara et al. (2021) reported that Indian and German samples experienced the smallest  
249 amount of gene flow among subspecies and would be the representative populations for CAS and  
250 DOM, respectively. Therefore, samples from these populations were used to calculate the  $f_4$ -statistics  
251 for the Madagascar population. To detect gene flow of the Madagascar population with CAS or DOM,  
252 we used 102,858,288 SNVs to compute  $f_4(\text{SPR}, \text{CAS}; \text{DOM}, \text{MDG})$  and  $f_4(\text{SPR}, \text{DOM}; \text{CAS}, \text{MDG})$ ,  
253 where MDG and SPR represent the Madagascar and *M. spretus* population, respectively. In both cases,  
254 the  $f_4$ -statistics scores indicate significantly positive values. The Z-score was 52.43 for  $f_4(\text{SPR}, \text{CAS};$   
255  $\text{DOM}, \text{MDG})$  and 26.25 for  $f_4(\text{SPR}, \text{DOM}; \text{CAS}, \text{MDG})$ , suggesting that the Madagascar population  
256 was genetically closer to CAS than to DOM, with a non-negligible amount of gene flow with DOM.  
257 Supplementary Table 3 presents the detailed results. To get a clearer picture of how the mouse  
258 population in Madagascar has propagated throughout history, we used the outgroup  $f_3$  statistics,  
259  $f_3(\text{MDG}, \text{X}; \text{SPR})$ , where X represents non-Madagascar samples. The results showed that individuals  
260 genetically close to the Madagascar population (high  $f_3$  values) were located around the coastal side of  
261 the South Asian regions and Indonesian islands but not specifically genetically close to samples from  
262 Nepal or Indonesia (Figure 3).

### 263 *Mitochondrial lineage analysis*

264 In addition to the above results inferred using autosomal data, we clarified the genetic  
265 background of Madagascar samples using mitochondrial genomes. Phylogenetic trees based on  
266 maximum likelihood of inference using the complete mitochondrial genome revealed that the five  
267 individuals from Madagascar formed a distinct cluster (Supplementary Figure 2). The Madagascar  
268 samples were found in the most basal cluster of all *M. musculus* mitochondrial haplotypes, but a  
269 bootstrap support was not sufficiently high (0.64). The tMRCA of the mitochondrial genome of the

270 Madagascar population was estimated using BEAST software. This analysis revealed that the  
271 Madagascar population expanded about 3,000 years ago (Figure 4b).

272 *Inference of past demographic history*

273 PSMC analysis was performed to estimate the demographic pattern of the Madagascar mouse  
274 population, including changes in the effective population size. All mouse samples from Madagascar  
275 experienced similar effective population size changes over the past 1,000,000 years (Figure 5a). It is  
276 clear that the Madagascar population experienced a rapid increase in effective population size from  
277 200,000 to 300,000 years ago, peaked around 100,000 years ago, and has been slowly declining since  
278 then over the Last Glacial Period. The PSMC plots for the representative individuals of CAS and DOM  
279 are also shown in Figure 5a. According to the PSMC plot, the DOM, CAS, and Madagascar  
280 populations experienced similar population histories until about 400,000–500,000 years ago. Then, the  
281 CAS and Madagascar populations experienced different population histories from the DOM, and they  
282 experienced similar population histories until about 100,000 years ago. The CAS population has  
283 experienced a rapid decrease in effective population size afterward. The Madagascar population has  
284 also experienced a similar decrease, but slower rate than the CAS population.

285 To reconstruct the CAS-Madagascar and DOM-Madagascar population divergence history,  
286 we applied two methods: MSMC and FastSimCoal2. For MSMC analysis, four haplotypes (two  
287 haplotypes from each) were used for the CAS-Madagascar and DOM-Madagascar analyses. Figure 5b  
288 shows the population separation histories (rCCR) of CAS-Madagascar and DOM-Madagascar. The  
289 timing of  $rCCR = 0.5$  between CAS and Madagascar was approximately 50,000 years ago (95%  
290 Confidence Interval (95% CI): 48,907–50,011) and between DOM and Madagascar was approximately  
291 225,000 years ago (95% CI: 224,641–226,546). Notably, the DOM-Madagascar rCCR plot in Figure  
292 5b shows a slight increase of rCCR from about 60,000–100,000 years ago. In order to confirm whether  
293 this slight increase is unique to the Madagascar population, we calculated the rCCR between the DOM  
294 and Indonesian populations, where the Austronesian-speaking people were supposed to migrated from.

295 We found that DOM-Indonesia did not exhibit any of these increases (Figure 5c). Furthermore, the  
296 rCCR of DOM-CAS (CAS from least admixture sample of India) was computed as a control. The  
297 rCCR of DOM-CAS did not show any specific increase between 60,000–100,000 years ago and  
298 showed almost the same pattern as the rCCR of DOM-Indonesia.

299 We also performed MSMC analysis using 10 haplotypes from the Madagascar population to  
300 analyze the relatively recent effective population size (Figure 6). The plot exhibits a historical  
301 bottleneck event of the Madagascar population around 1,000–3,000 years ago.

302 We further performed coalescent simulations using FastSimCoal2 with the joint allele  
303 frequency spectrum data. The FastSimCoal2 simulations enabled us to estimate the population  
304 separation time of CAS-Madagascar or DOM-Madagascar, assuming a constant migration rate over  
305 time between the populations after the population split. The results showed the divergence between  
306 CAS and Madagascar was about 99,000 years ago (95% CL: 98,102–100,417), and the divergence  
307 between DOM and Madagascar was approximately 114,000 years ago (95% CL: 112,941–115,220).  
308 Table 2 presents the detailed estimated demographic parameters.

309 **Discussion**

310 *Genetic background of the Madagascar wild house mouse population*

311 Previous studies have shown that the wild *M. musculus* exhibit a very large effective  
312 population size and nucleotide diversity compared to humans. The Madagascar house mice analyzed  
313 in this study also showed a higher nucleotide diversity of 0.31% compared with humans (0.08%–  
314 0.12%); however, this value is less than half of the nucleotide diversity in CAS (0.74%–0.79%),  
315 slightly higher than the nucleotide diversity in MUS (0.18%–0.25%), and within the range of the  
316 nucleotide diversity in DOM (0.07%–0.35%). The relatively low nucleotide diversity within the *M.*  
317 *musculus* population may be related to the fact that the Madagascar house mouse population  
318 experienced a bottleneck when they were introduced onto the island.

319 Based on the PCA plot,  $f_4$ -statistics test, and neighbor-joining phylogenetic trees, we conclude  
320 that the sampled Madagascar population genetically belongs to CAS as a subspecies. This result is  
321 consistent with and supports a previous microsatellite study (Hardouin *et al.*, 2015). However, PCA,  
322  $f_4$ -statistic test, and MSMC analysis demonstrated that the Madagascar population has experienced  
323 ancient admixture events with the DOM subspecies. The recent quantitative trait loci study of genes  
324 associated with hybrid fitness of *M. musculus* identified regions causing hybrid male sterility in CAS  
325 and DOM hybrids on autosomes, the X chromosome, and the pseudoautosomal region (PAR) of sex  
326 chromosomes (White *et al.*, 2012). According to the study conducted by White *et al.*, a fairly high  
327 percentage of male individuals in the hybrid second generation ( $F_2$ ), exhibited phenotypes associated  
328 with infertility, indicating that CAS and DOM hybrids have difficulty in constructing long-lasting  
329 hybrids. Nevertheless, the Madagascar population exhibits the DOM-like CAS genetic feature,  
330 indicating that inter-subspecific hybridization would be rare but possible, or hybrid incompatibility  
331 was not so strong around 60,000–100,000 years ago.

332 The mitochondrial genome analysis indicates that the mitochondrial lineages of the  
333 Madagascar population consist of a monophyletic group with low nucleotide diversity and that these



334 lineages have a recent and unique origin. MSMC analysis using 10 haplotypes from five samples of  
335 the Madagascar population showed that the Madagascar population experienced a bottleneck event  
336 about 1000–3000 years ago. This result is consistent with the mitochondrial analysis and suggests that  
337 *M. musculus* may have entered Madagascar during this period. These pattern supports the previous  
338 mitochondrial DNA study by Duplantier et al. (Duplantier *et al.*, 2002; Sakuma *et al.*, 2016). However,  
339 the study by Duplantier et al. (2002), which analyzed 539 nucleotide sites in D-Loop of the  
340 mitochondrial genome, differs from our results in that the MUS is located at the basal in the  
341 phylogenetic tree. We created a phylogenetic tree with approximately 16,000 bp and showed the  
342 mitochondrial genealogy with higher resolution than previous analyses. However, it should be noted  
343 that the bootstrap value supporting the basal position of Madagascar mitochondrial lineage was 0.64,  
344 which is not sufficiently high to draw a conclusion.

345         The MSMC results indicate that the Madagascar and CAS populations diverged about 50,000  
346 years ago, whereas the DOM population diverged as far back as 225,000 years ago. However, there  
347 was a small but clear increase of rCCR between the DOM and Madagascar populations around 60,000–  
348 100,000 years ago. This pattern may represent an admixture event between DOM and CAS in the  
349 ancestral population of the Madagascar house mice. To ensure that the admixture event was unique to  
350 the Madagascar wild house mouse population, we computed and compared rCCR for DOM-Indonesia.  
351 We selected the Indonesian sample for comparison because humans from Indonesian Borneo Island  
352 are considered one of the ancestral origins of the Malagasy people. We thought if DOM-Indonesia  
353 showed the same shape of rCCR as DOM-Madagascar, the Madagascar wild house mouse population  
354 might be of Indonesian origin, and the increase in rCCR around 60,000–100,000 years ago would be  
355 shared by the Indonesian CAS. However, according to the rCCR plot in Figure 5c, the DOM-Indonesia  
356 exhibited a different rCCR decline than DOM-Madagascar.

357         FastSimCoal2 analysis showed that the divergence from CAS was about 99,000 years and  
358 that from DOM was about 114,000 years, indicating that, as in MSMC, the divergence from the CAS

359 population occurred relatively recently compared with that for the DOM population. However, when  
360 the MSMC results were compared with the FastSimCoal2 results, there was a difference in the  
361 estimated divergence time. The MSMC model does not assume any specific demographic models, but  
362 the FastSimCoal2 model assumes a continuous gene flow rate between the two populations. The  
363 different assumptions may cause a discrepancy between the results of MSMC and FastSimCoal2. In  
364 any case, it is safe to assume that the CAS and Madagascar populations likely diverged in the range of  
365 50,000–99,000 years and the DOM and Madagascar populations diverged in the range of 115,000–  
366 225,000 years.

### 367 *Possible migration history of the Madagascar wild house mouse population*

368 Since the human population in Madagascar seems to be dual origin from the Indonesian  
369 Borneo Island in Southeast Asia and the east coast of the African continent, the house mice were  
370 probably introduced to Madagascar island associated with the migration of humans.

371 First, we consider when the ancestors of the Madagascar house mice entered the island.  
372 Although the molecular evolution rate of mitochondria, the mutation rate in nuclear genomes, and the  
373 generation time of mice are debatable issues and estimated time would be highly vulnerable with these  
374 assumptions, our mitochondrial genealogy and MSMC analysis consistently showed that they  
375 experienced a strong population bottleneck around 1000–3000 years ago. Although the estimated time  
376 range is wide, it is equivalent to the commonly accepted timing of migration when Austronesian-  
377 speaking people from the Indonesian islands arrived in Madagascar (BCE 300–CE 500) (Dewar and  
378 Wright, 1993; Burney *et al.*, 2004), as well as the estimated timing using human genetic data (Hurles  
379 *et al.*, 2005). Since commensal animals, such as house mice, would not suddenly expand their  
380 population size without a proper type of human activity, such as agriculture, we suggest that the  
381 Madagascar house mice migrated to the island simultaneously or soon after the first Austronesian-  
382 speaking farmers arrived on the island.

383 Second, where did the Madagascar house mice originate, and did the Austronesian-speaking

384 people bring house mice from their homeland? Our various analyses consistently show that the  
385 Madagascar samples belong to CAS, but were not specifically close to Indonesian samples. In  
386 particular, the Madagascar population showed a particular signature containing an ancient admixture  
387 with DOM around 60,000–100,000 years ago (Figure 5c), which is not observed in the Indonesian  
388 samples. In addition, based on the analysis of  $f_3$  statistics, they instead show affinity to a wide range  
389 of CAS samples from the coastal regions of the Indian Ocean, such as present-day Bangladesh, India,  
390 and Sri Lanka. These broad affinities may represent more recent admixture events through trading  
391 across the Indian Ocean.

392         Based on the above evidence, we propose the following two hypotheses for the history of  
393 introducing the wild house mouse to Madagascar island. Based on our results supporting a non-  
394 Indonesian origin of the Madagascar population, the Madagascar wild house mouse may have been  
395 brought to the island by Austronesian-speaking people who passed through the coastal Indian Ocean  
396 route to Madagascar. Although ancient migrants could directly travel from Indonesian islands to  
397 Madagascar with their nautical technology, it does not necessarily exclude the possibility that they  
398 temporarily stayed in coastal areas and picked up local mice of which the mitochondrial lineage is  
399 currently extinct. The second possibility is that an ancient Madagascar house mouse population  
400 migrated from the neighboring coastal areas due to trade or other exchanges shortly after the first  
401 migration of the Austronesian-speaking people. Since there are many commensal animals prevalent on  
402 the island, we do not necessarily assume that all of them came to the island accompanied with the  
403 Austronesian-speaking people. Because the ancient admixture between DOM and CAS did not likely  
404 occur in Southeast Asia, they may have come from somewhere around the South Asia or Middle East.

405         Based on current evidence, there is no genetic or archaeological trace of a human migration  
406 route to Madagascar island via South Asian coastal line, we consider the latter hypothesis, that the  
407 Madagascar house mice came from the South Asia or Middle East, is more likely. The previous study  
408 by Sakuma et al. (2016) showed that the mitochondrial genome of the Madagascar sample is

409 genetically close to the Yemen samples (Sakuma *et al.*, 2016), suggesting that the Madagascar house  
410 mice might have originated from a region around the Middle East. In that case, because Yemen is not  
411 in the distribution range of typical CAS, it is possible that the distribution of the house mice subspecies  
412 in the Middle East approximately 1000–3000 years ago would be different from the current one, and  
413 the direct ancestor of the Madagascar house mice may have gone extinct on the continent.  
414 Unfortunately, our samples did not fully cover these regions, and further studies will clarify the detailed  
415 history of the Madagascar house mice and its relationship with human activity.

416

417 **Conclusion**

418           This study determined the whole-genome sequences of five Madagascar wild house mouse  
419 populations and analyzed their genetic backgrounds. Until today, mice from Madagascar have been  
420 treated as DOM or *M. m. gentilulus*, but genomic evidence indicates that their genetic feature belongs  
421 to CAS. However, we observed fragments of DOM that may have been admixed 60,000–100,000 years  
422 ago. In addition, mitochondrial and nuclear genome evidence indicates that they experienced a  
423 bottleneck approximately 1000–3000 years ago, coincides with the arrival of Austronesian humans to  
424 Madagascar. However, the genetic relationship between the Madagascar and Indonesian samples does  
425 not appear to be very close. Based on the results of this study, we propose that the mice arrived in  
426 Madagascar through trade right after the first Austronesians arrived on Madagascar. In the future,  
427 mouse samples from the Middle East and Borneo will be needed better to define the genetic  
428 backgrounds of the Madagascar mouse population. Overall, this study provides insight into the rodents  
429 that have successfully migrated to Madagascar, which has only been partially understood.

430 **Data Availability**

431           The short-read whole-genome sequencing data generated in this study have been submitted  
432 to the DDBJ BioProject database (<https://www.ddbj.nig.ac.jp/bioproject/>) under the accession number  
433 PRJDB11969. The complete mitochondrial genome sequences are submitted to DDBJ database under  
434 the accession number LC644158–LC644162.

435

436 **Competing Interest Statement**

437           The authors declare no competing interests.

438

439 **Acknowledgements**

440           This work was partly supported by the MEXT KAKENHI (grant 18H05511 to N. O.). We  
441 would like to express my gratitude to Dr. Chihiro Tanaka, who belongs to Animal Care and Exhibition  
442 Section, Yagiyama Zoological Park, Sendai, Japan, for her support of the sample collection project.  
443 We would also like to express my deepest gratitude to Drs. Kimiyuki Tsuchiya and Hajanirina Ramino  
444 for sample collection in Madagascar.

## 445 **Figure Legends**

### 446 *Figure 1*

447 Principal Component Analysis plot of *M. musculus* using autosomal single nucleotide variants (SNVs).  
448 The points in the figure represent the eigenvalues of individual samples collected from the countries  
449 shown in the right. The upper left, lower left, and right vertices of triangle represent *Mus musculus*  
450 *domesticus* (DOM), *M. m. castaneus* (CAS), and *M. m. musculus* (MUS) genetic components,  
451 respectively. The proportion of variance for each eigenvalue is shown in parentheses on the labels of  
452 *x*-axis and *y*-axis. The arrow shows the position of Madagascar population.

### 453 *Figure 2*

454 The neighbor-joining tree inferred using pairwise genetic distances of *M. musculus*. The seven  
455 samples of *M. spretus* (SPR) were used as the outgroups. The color shows the subspecies: red (*M. m.*  
456 *musculus*: MUS), green (*M. m. castaneus*: CAS), blue (*M. m. domesticus*: DOM), and cyan (*M.*  
457 *musculus* - Madagascar). The hybrid samples were excluded for constructing distance tree.

### 458 *Figure 3*

459 The  $f_3$  statistics test results assuming an outgroup  $f_3$  (MDG, X; SPR) scenario. The right plot shows the  
460 top 20 of the outgroup  $f_3$  statistics values in which individuals of regional origin are genetically close  
461 to the Madagascar wild house mouse population. The horizontal line associated with each point  
462 indicates the standard error. The higher values indicate genetic closeness to the Madagascar house  
463 mouse population. The left world map shows the  $f_3$  statistics value heat map focused on the South  
464 Asian region.

### 465 *Figure 4*

466 Divergence time estimates (million years ago) of the five phylogroups of the *M. musculus* subspecies  
467 based on entire mitochondrial genome sequences (15,181 bp) and a Bayesian-relaxed molecular clock  
468 of  $2.4 \times 10^{-8}$  substitutions/site/year (**a**). Blue bars represent the 95% highest posterior density interval.  
469 See Li et al. (2021) for the details of the subclades. Given the time-dependency of the mtDNA

470 evolutionary rate, the mean time of the most recent common ancestor of the five haplotypes from  
471 Madagascar was estimated with a molecular clock of  $1.1 \times 10^{-7}$  substitutions/site/year **(b)**.

472 *Figure 5*

473 The Pairwise Sequentially Markovian Coalescent (PSMC) plot and the Multiple Sequentially  
474 Markovian Coalescent (MSMC) plot of the inter-population divergence of *M. musculus*. The green,  
475 blue, and black lines represent the inferred effective population size transition of CAS, DOM, and  
476 Madagascar (MDG) mouse populations, respectively **(a)**. The *x*-axis represents generations before the  
477 present scaled by the mutation rate  $0.57 \times 10^{-8}$  per site per generation and the *y*-axis represents the  
478 number of the inferred effective population size. The lines with lighter colors represent 100 replications  
479 of the bootstrapping results. The figure shows the relative cross coalescent rate (rCCR) between the  
480 CAS-MDG and DOM-MDG inter-populations **(b)**. The 20 replications bootstrapping results are  
481 represented by multicolor. Comparative plot of rCCR for DOM-CAS (MDG) and DOM-CAS  
482 (Indonesia, IDN) scenarios with DOM-CAS (India, IND) as a control. **(c)**.

483 *Figure 6*

484 The Multiple Sequentially Markovian Coalescent plot of five Madagascar samples using 10 haplotypes.  
485 The *x*-axis represents generations before the present scaled by a mutation rate of  $0.57 \times 10^{-8}$  per site  
486 per generation. The *y*-axis represents the number of the inferred effective population size of  
487 Madagascar house mice. The MSMC plot with multiple haplotypes can demonstrate the recent inferred  
488 effective population size.



489 **Reference**

- 490 Adelaar A (1995). Asian roots of the Malagasy; A linguistic perspective. *Bijdragen Tot De Taal- Land-*  
491 *En Volkenkunde / J Humanit Soc Sci Southeast Asia* 151: 325–356.
- 492 Allibert C (1988). Les contacts entre l’Arabie, le Golfe persique, l’Afrique orientale et Madagascar:  
493 confrontation des documents écrits, des traditions orales et des données archéologiques récentes.  
494 MOM Éditions 16: 111–126.
- 495 Andrews S (2010). FastQC: a quality control tool for high throughput sequence data.  
496 <https://www.bioinformatics.babraham.ac.uk/projects/fastqc/>
- 497 Battistini R, Verin P (1972). Man and the environment in Madagascar. In: *Monographiae Biologicae*.  
498 Springer Netherlands: Dordrecht, p 311.
- 499 Boursot P, Din W, Anand R, Darviche D, Dod B, Deimling FV, et al. (1996). Origin and radiation of  
500 the house mouse: mitochondrial DNA phylogeny. *J Evolution Biol* 9: 391–415.
- 501 Bryant D, Moulton V (2004). Neighbor-Net: an agglomerative method for the construction of  
502 phylogenetic networks. *Mol Biol Evol* 21: 255–265.
- 503 Burney DA, Burney LP, Godfrey LR, Jungers WL, Goodman SM, Wright HT, et al. (2004). A  
504 chronology for late prehistoric Madagascar. *J Hum Evol* 47: 25–63.
- 505 Cingolani P, Patel VM, Coon M, Nguyen T, Land SJ, Ruden DM, et al. (2012). Using *Drosophila*  
506 *melanogaster* as a model for genotoxic chemical mutational studies with a new program, SnpSift.  
507 *Frontiers Genetics* 3: 35.
- 508 Cingolani P, Platts A, Wang LL, Coon M, Nguyen T, Wang L, et al. (2012). A program for  
509 annotating and predicting the effects of single nucleotide polymorphisms, SnpEff. *Fly* 6: 80–92.
- 510 Dahl OC (1951). *Malgache et maanjan: une comparaison linguistique*. Egede Instituttet: Oslo.
- 511 Dahl OC (1988). Bantu substratum in Malagasy. In: *Linguistique de Madagascar et des Comores*,  
512 *Etudes Océan indien*. Vol 9, pp 91–132.
- 513 Delaneau O, Zagury J-F, Robinson MR, Marchini JL, Dermitzakis ET (2019). Accurate, scalable and  
514 integrative haplotype estimation. *Nat Commun* 10: 5436.

- 515 Dewar RE, Radimilahy C, Wright HT, Jacobs Z, Kelly GO, Berna F (2013). Stone tools and foraging  
516 in northern Madagascar challenge Holocene extinction models. *Proc National Acad Sci* 110:  
517 12583–12588.
- 518 Dewar RE, Wright HT (1993). The culture history of Madagascar. *J World Prehist* 7: 417–466.
- 519 Dierckxsens N, Mardulyn P, Smits G (2017). NOVOPlasty: de novo assembly of organelle genomes  
520 from whole genome data. *Nucleic Acids Res* 45: e18–e18.
- 521 Din W, Anand R, Boursot P, Darviche D, Dod B, Jouvin-Marche E, et al. (1996). Origin and  
522 radiation of the house mouse: clues from nuclear genes. *J Evolution Biol* 9: 519–539.
- 523 Douglass K, Hixon S, Wright HT, Godfrey LR, Crowley BE, Manjakahery B, et al. (2019). A critical  
524 review of radiocarbon dates clarifies the human settlement of Madagascar. *Quaternary Sci Rev*  
525 221: 105878.
- 526 Drummond AJ, Rambaut A (2007). BEAST: Bayesian evolutionary analysis by sampling trees.  
527 *BMC Evol Biol* 7: 214.
- 528 Duplantier J-M, Orth A, Catalan J, Bonhomme F (2002). Evidence for a mitochondrial lineage  
529 originating from the Arabian peninsula in the Madagascar house mouse (*Mus musculus*). *Heredity*  
530 89: 154–158.
- 531 Edgar RC (2004a). MUSCLE: a multiple sequence alignment method with reduced time and space  
532 complexity. *BMC Bioinformatics* 5: 113.
- 533 Edgar RC (2004b). MUSCLE: multiple sequence alignment with high accuracy and high throughput.  
534 *Nucleic Acids Res* 32: 1792–1797.
- 535 Excoffier L, Dupanloup I, Huerta-Sánchez E, Sousa VC, Foll M (2013). Robust demographic  
536 inference from genomic and SNP data. *Plos Genet* 9: e1003905.
- 537 Fujiwara K, Kawai Y, Moriwaki K, Takada T, Shiroishi T, Saitou N, et al. (2021). Insights into *Mus*  
538 *musculus* subspecies population structure across Eurasia revealed by whole-genome sequence  
539 analysis. *bioRxiv*: 2021.02.05.429881.
- 540 Goodman SM (1995). *Rattus* on Madagascar and the dilemma of protecting the endemic rodent  
541 fauna. *Conserv Biol* 9: 450–453.

- 542 Hansford J, Wright PC, Rasoamiaramanana A, Pérez VR, Godfrey LR, Errickson D, et al. (2018).  
543 Early Holocene human presence in Madagascar evidenced by exploitation of avian megafauna.  
544 Sci Adv 4: eaat6925.
- 545 Hardouin EA, Orth A, Teschke M, Darvish J, Tautz D, Bonhomme F (2015). Eurasian house mouse  
546 (*Mus musculus* L.) differentiation at microsatellite loci identifies the Iranian plateau as a  
547 phylogeographic hotspot. BMC Evol Biol 15: 26.
- 548 Harr B, Karakoc E, Neme R, Teschke M, Pfeifle C, Pezer Ž, et al. (2016). Genomic resources for  
549 wild populations of the house mouse, *Mus musculus* and its close relative *Mus spretus*. Scientific  
550 Data 3:160075.
- 551 Ho SYW, Lanfear R, Bromham L, Phillips MJ, Soubrier J, Rodrigo AG, et al. (2011). Time-  
552 dependent rates of molecular evolution. Mol Ecol 20: 3087–3101.
- 553 Hurles ME, Sykes BC, Jobling MA, Forster P (2005). The dual origin of the Malagasy in island  
554 Southeast Asia and East Africa: evidence from maternal and paternal lineages. Am J Hum  
555 Genetics 76: 894–901.
- 556 Jing M, Yu H, Bi X, Lai Y, Jiang W, Huang L (2014). Phylogeography of Chinese house mice (*Mus*  
557 *musculus musculus/castaneus*): distribution, routes of colonization and geographic regions of  
558 hybridization. Mol Ecol 23: 4387–4405.
- 559 Kalyaanamoorthy S, Minh BQ, Wong TKF, Haeseler A von, Jermini LS (2017). ModelFinder: fast  
560 model selection for accurate phylogenetic estimates. Nat Methods 14: 587–589.
- 561 Kumar S, Stecher G, Tamura K (2016). MEGA7: molecular evolutionary genetics analysis version  
562 7.0 for bigger datasets. Mol Biol Evol 33: 1870–1874.
- 563 Li H, Durbin R (2011). Inference of human population history from individual whole-genome  
564 sequences. Nature 475: 493–496.
- 565 Li Y, Fujiwara K, Osada N, Kawai Y, Takada T, Kryukov AP, et al. (2021). House mouse *Mus*  
566 *musculus* dispersal in East Eurasia inferred from 98 newly determined complete mitochondrial  
567 genome sequences. Heredity 126: 132–147.
- 568 Liszkowski HD (2000). Mayotte et les Comores: escales sur la route des Indes aux XVe et XVIIIe  
569 siècles. Editions du Baobab: Mamoudzou, Mayotte, France.

- 570 Liu EY, Morgan AP, Chesler EJ, Wang W, Churchill GA, Villena FP-M de (2014). High-resolution  
571 sex-specific linkage maps of the mouse reveal polarized distribution of crossovers in male  
572 germline. *Genetics* 197: 91–106.
- 573 MacPhee RDE, Burney DA (1991). Dating of modified femora of extinct dwarf Hippopotamus from  
574 Southern Madagascar: Implications for constraining human colonization and vertebrate extinction  
575 events. *J Archaeol Sci* 18: 695–706.
- 576 Malaspina A-S, Westaway MC, Muller C, Sousa VC, Lao O, Alves I, et al. (2016). A genomic  
577 history of Aboriginal Australia. *Nature* 538: 207–214.
- 578 Manichaikul A, Mychaleckyj JC, Rich SS, Daly K, Sale M, Chen W-M (2010). Robust relationship  
579 inference in genome-wide association studies. *Bioinform Oxf Engl* 26: 2867–73.
- 580 Marshall J (1998). Identification and scientific names of Eurasian house mice and their European  
581 allies, subgenus *Mus* (Rodentia, Muridae). National Museum of Natural History, Washington.
- 582 Milholland B, Dong X, Zhang L, Hao X, Suh Y, Vijg J (2017). Differences between germline and  
583 somatic mutation rates in humans and mice. *Nat Commun* 8: 15183.
- 584 Nguyen L-T, Schmidt HA, Haeseler A von, Minh BQ (2015). IQ-TREE: A fast and effective  
585 stochastic algorithm for estimating maximum-likelihood phylogenies. *Mol Biol Evol* 32: 268–  
586 274.
- 587 Orsini P, Bonhomme F, Britton-Davidian J, Croset H, Guerasimov S, Thaler L (1983). Le complexe  
588 d'espèces du genre *Mus* en Europe centrale et orientale. II Critères d'identification, répartition,  
589 caractéristiques écologiques. *Z f Säugetierkunde* 48: 86–99.
- 590 Paradis E, Claude J, Strimmer K (2004). APE: analyses of phylogenetics and evolution in R  
591 language. *Bioinformatics* 20: 289–290.
- 592 Patterson N, Moorjani P, Luo Y, Mallick S, Rohland N, Zhan Y, et al. (2012). Ancient admixture in  
593 human history. *Genetics* 192: 1065–1093.
- 594 Patterson N, Price AL, Reich D (2006). Population structure and eigenanalysis. *Plos Genet* 2: e190.
- 595 Phifer-Rixey M, Bi K, Ferris KG, Sheehan MJ, Lin D, Mack KL, et al. (2018). The genomic basis of  
596 environmental adaptation in house mice. *PLoS Genet* 14: e1007672.

- 597 Pierron D, Heiske M, Razafindrazaka H, Rakoto I, Rabetokotany N, Ravololomanga B, et al. (2017).  
598 Genomic landscape of human diversity across Madagascar. *Proc National Acad Sci* 114: E6498–  
599 E6506.
- 600 Pockrandt C, Alzamel M, Iliopoulos CS, Reinert K (2020). GenMap: Ultra-fast computation of  
601 genome mappability. *Bioinformatics* 36: 3687–3692.
- 602 Prager EM, Orrego C, Sage RD (1998). Genetic variation and phylogeography of Central Asian and  
603 other house mice, including a major new mitochondrial lineage in Yemen. *Genetics* 150: 835–  
604 861.
- 605 Purcell S, Neale B, Todd-Brown K, Thomas L, Ferreira MAR, Bender D, et al. (2007). PLINK: a  
606 tool set for whole-genome association and population-based linkage analyses. *Am J Hum*  
607 *Genetics* 81: 559–575.
- 608 Rakotondravony A, Randrianjafy R (1998). Espèces introduites et endémiques de Madagascar:  
609 description, répartition, biologie et écologie. In: Zehrer W, Rafanomezana S (eds) Proceedings of  
610 Symposium “Rongeurs et lutte antimurine à Madagascar”, Tamatave, 6–9 Décembre 1994, DPV/  
611 GTZ pub: Antananarivo, Madagascar, pp 51–76.
- 612 Rambaut A, Drummond AJ, Xie D, Baele G, Suchard MA (2018). Posterior summarization in  
613 Bayesian phylogenetics using Tracer 1.7. *Systematic Biol* 67: 901–904.
- 614 Saitou N, Nei M (1987). The neighbor-joining method: a new method for reconstructing  
615 phylogenetic trees. *Mol Biol Evol* 4: 406–25.
- 616 Sakuma Y, Ranoroosa MC, Kinoshita G, Shimoji H, Tsuchiya K, Ohdachi SD, et al. (2016).  
617 Variation in the coat-color-controlling genes, *Mclr* and *Asip*, in the house mouse *Mus musculus*  
618 from Madagascar. *Mamm Study* 41: 131–140.
- 619 Schiffels S, Durbin R (2014). Inferring human population size and separation history from multiple  
620 genome sequences. *Nat Genet* 46: 919–925.
- 621 Schiffels S, Wang K (2020). MSMC and MSMC2: The multiple sequentially markovian coalescent.  
622 In: Dutheil JY (ed) *Statistical Population Genomics, Methods in Molecular Biology*. Humana:  
623 New York, NY, pp 147–166.
- 624 Schliep KP (2011). phangorn: phylogenetic analysis in R. *Bioinformatics* 27: 592–593.

- 625 Searle JB, Jamieson PM, Gndz slam, Stevens MI, Jones EP, Gemmill CEC, et al. (2009). The diverse  
626 origins of New Zealand house mice. *Proc Royal Soc B Biological Sci* 276: 209–217.
- 627 Suzuki H, Nunome M, Kinoshita G, Aplin KP, Vogel P, Kryukov AP, et al. (2013). Evolutionary and  
628 dispersal history of Eurasian house mice *Mus musculus* clarified by more extensive geographic  
629 sampling of mitochondrial DNA. *Heredity* 111: 375–390.
- 630 Suzuki H, Yakimenko LV, Usuda D, Frisman LV (2015). Tracing the eastward dispersal of the  
631 house mouse, *Mus musculus*. *Genes Environ* 37: 20.
- 632 Verin P, Wright H (1999). Madagascar and Indonesia: new evidence from archaeology and  
633 linguistics. *Bull Indo Pac Pre Hi* 18.
- 634 White MA, Stubbings M, Dumont BL, Payseur BA (2012). Genetics and evolution of hybrid male  
635 sterility in house mice. *Genetics* 191: 917–934.
- 636 Zheng X, Gogarten SM, Lawrence M, Stilp A, Conomos MP, Weir BS, et al. (2017). SeqArray—a  
637 storage-efficient high-performance data format for WGS variant calls. *Bioinformatics* 33: 2251–  
638 2257.
- 639 Zheng X, Levine D, Shen J, Gogarten SM, Laurie C, Weir BS (2012). A high-performance  
640 computing toolset for relatedness and principal component analysis of SNP data. *Bioinformatics*  
641 28: 3326–3328.

642

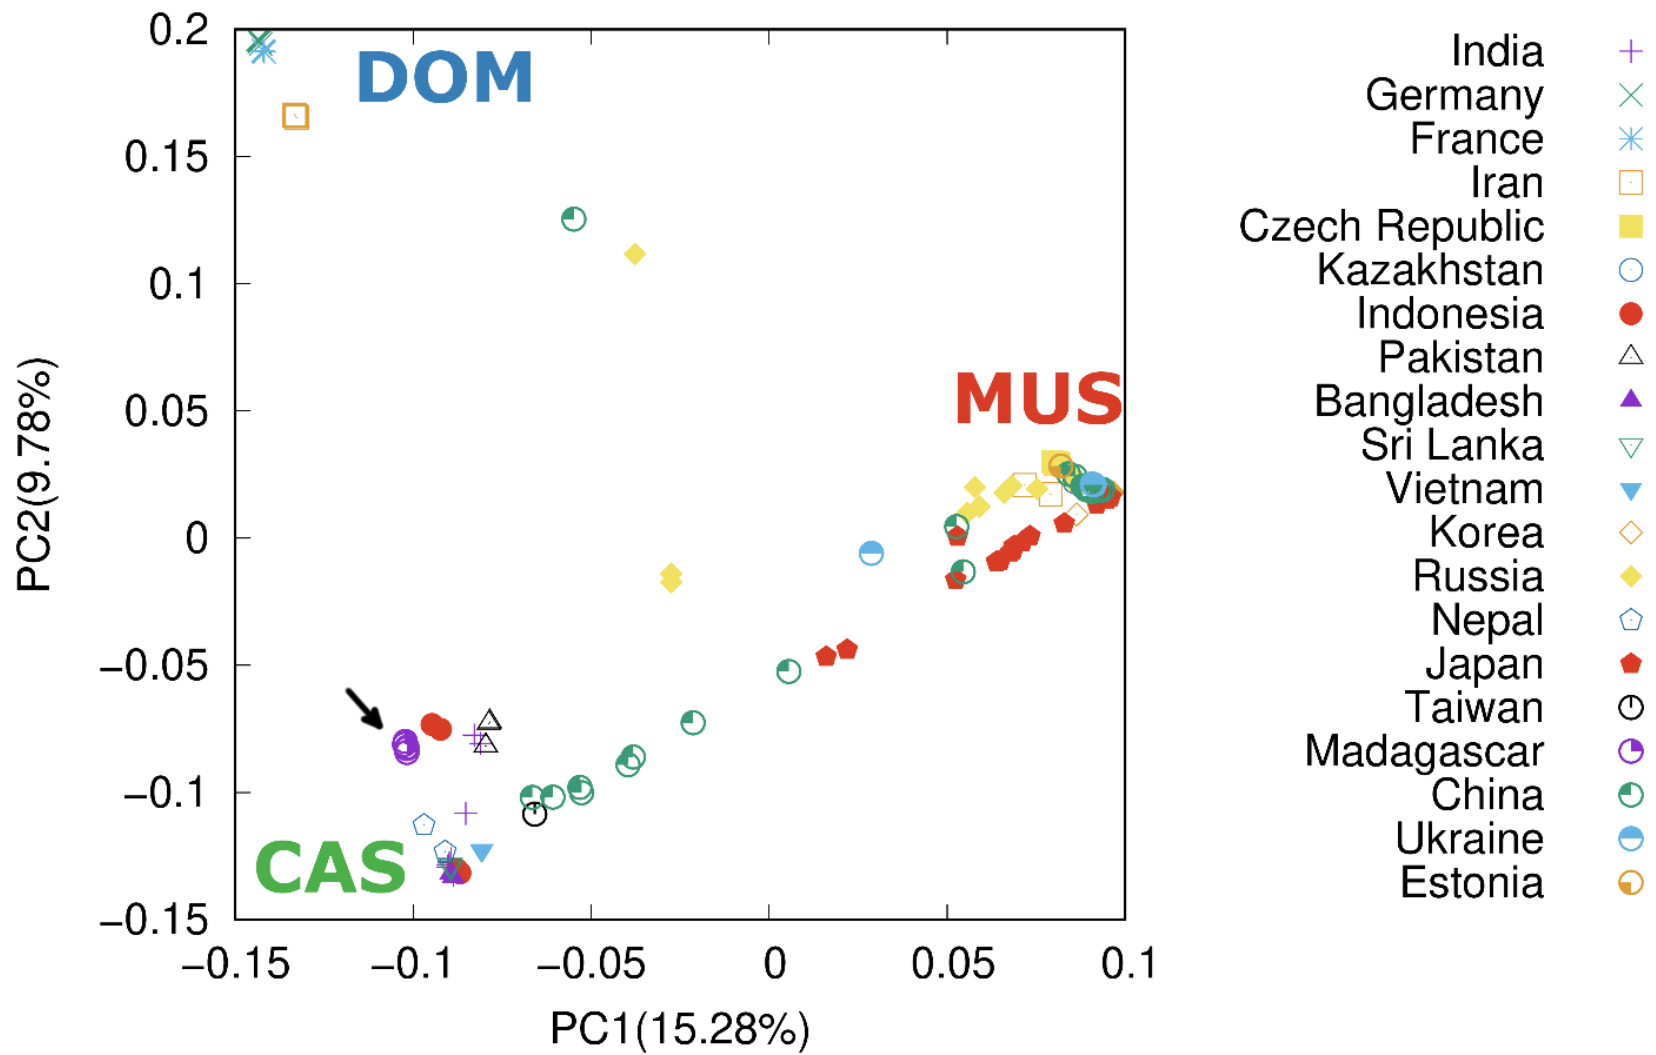

Figure 1.

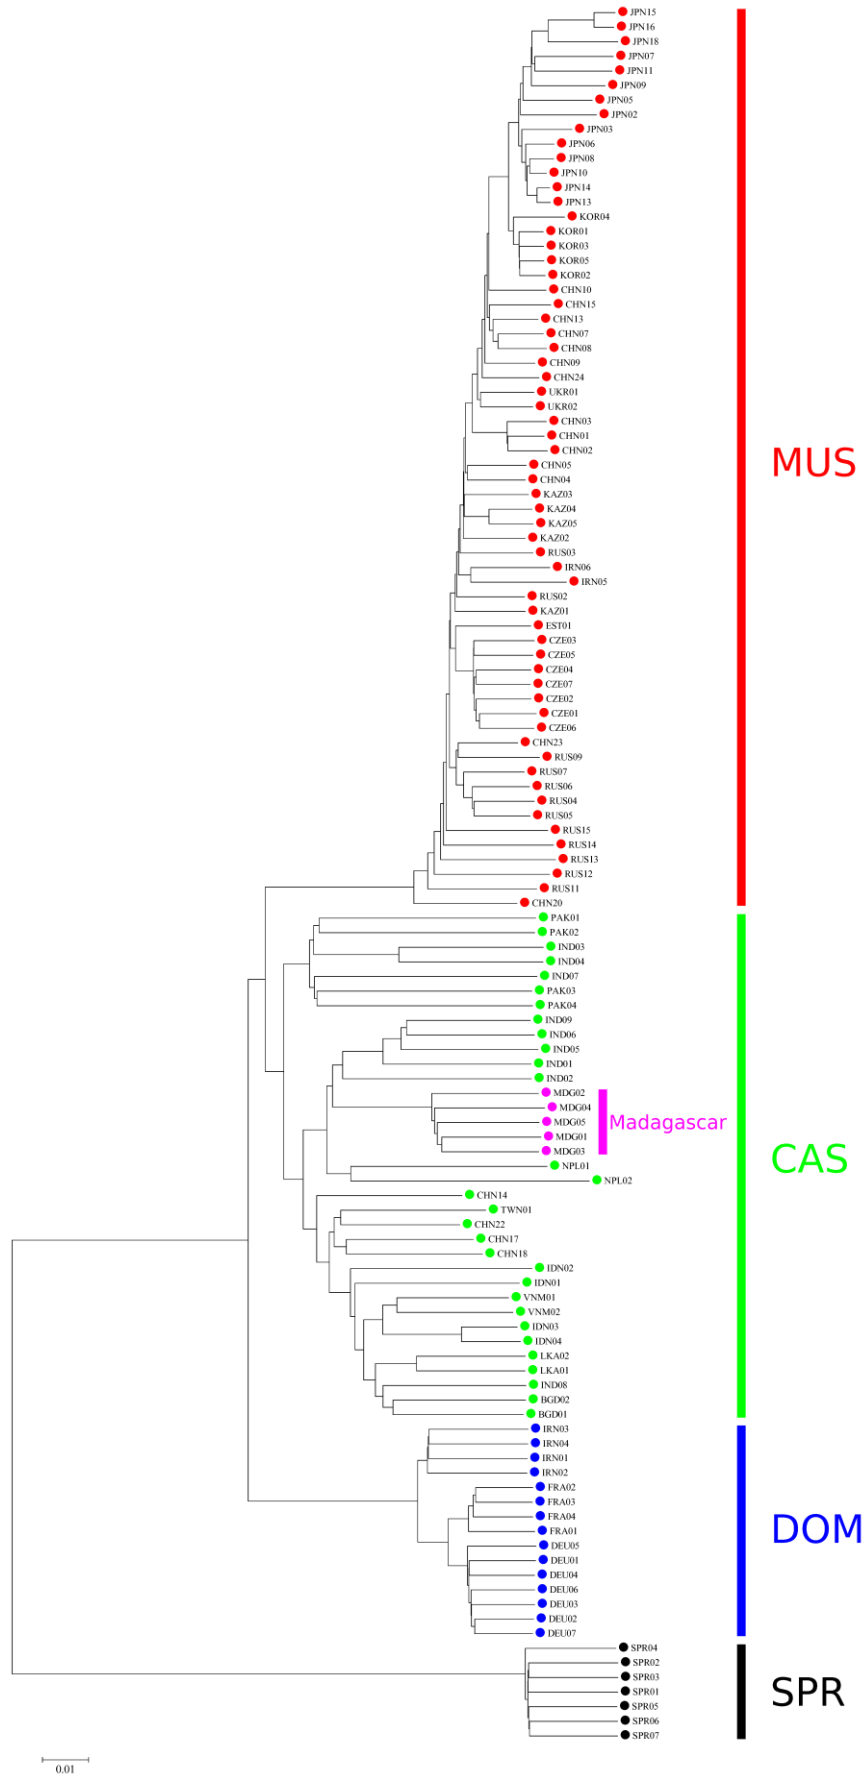

Figure 2.



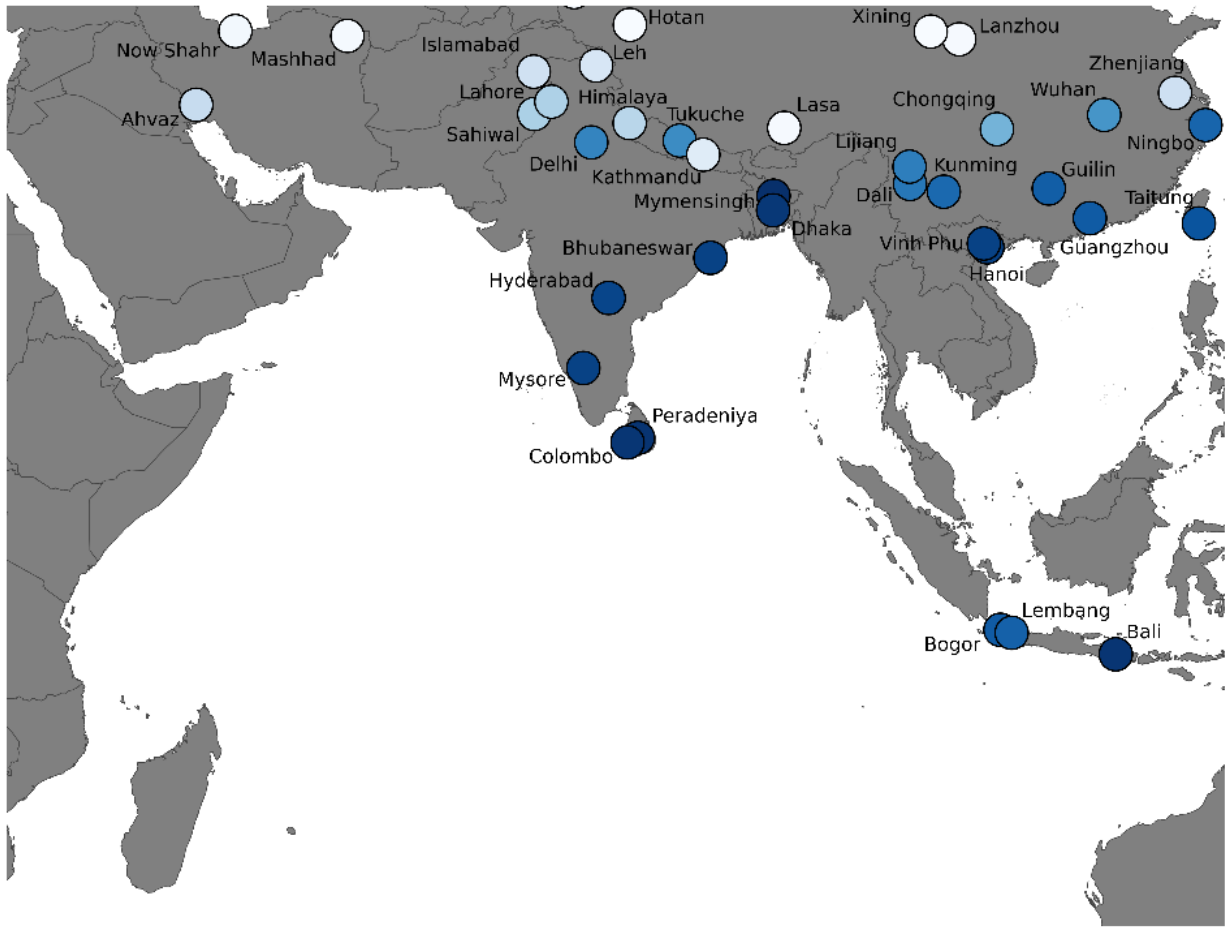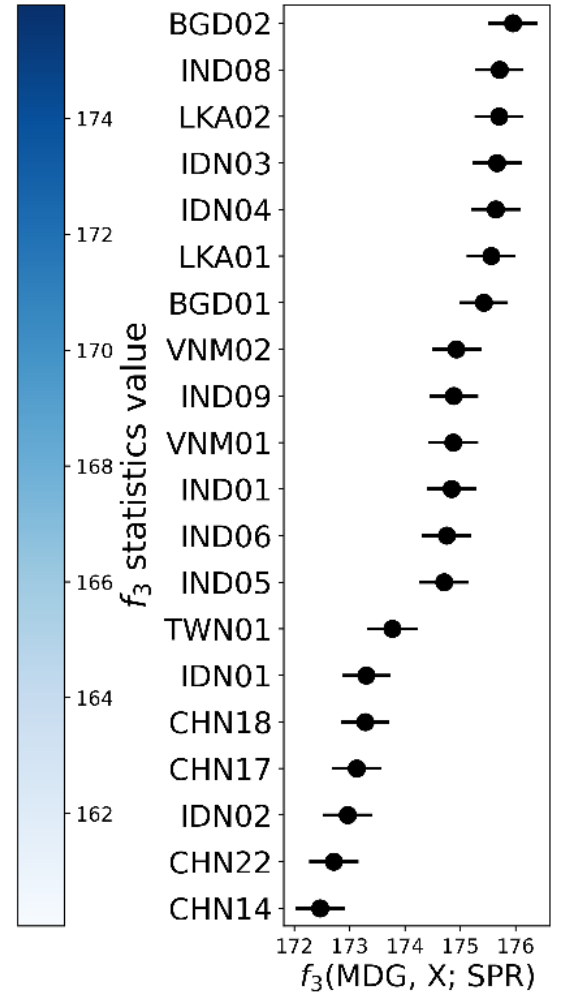

Figure 3.

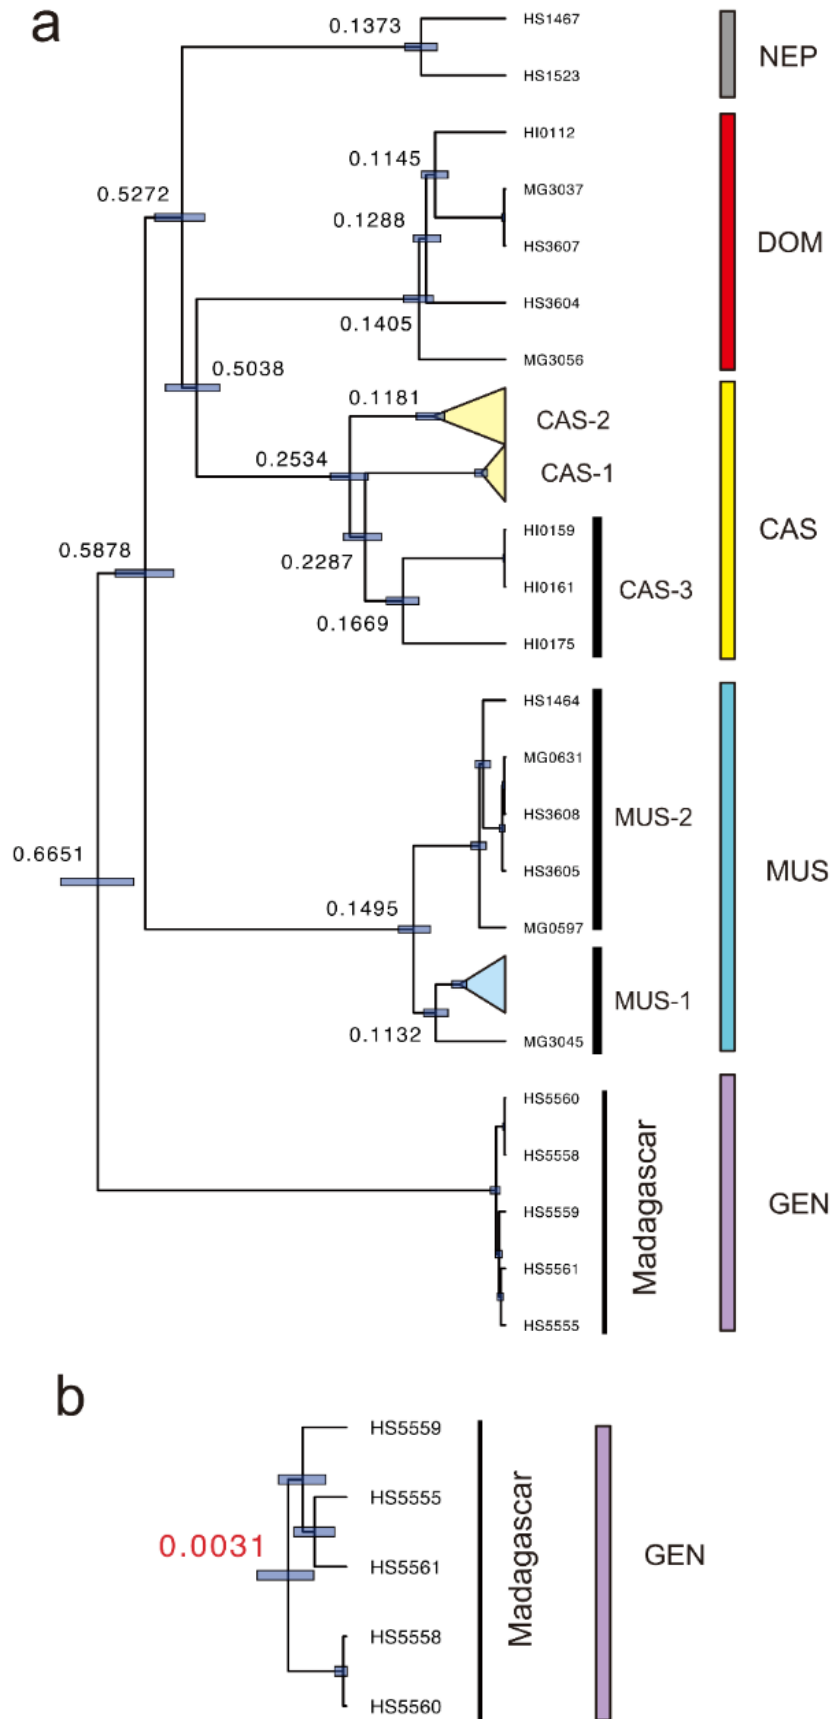

Figure 4.

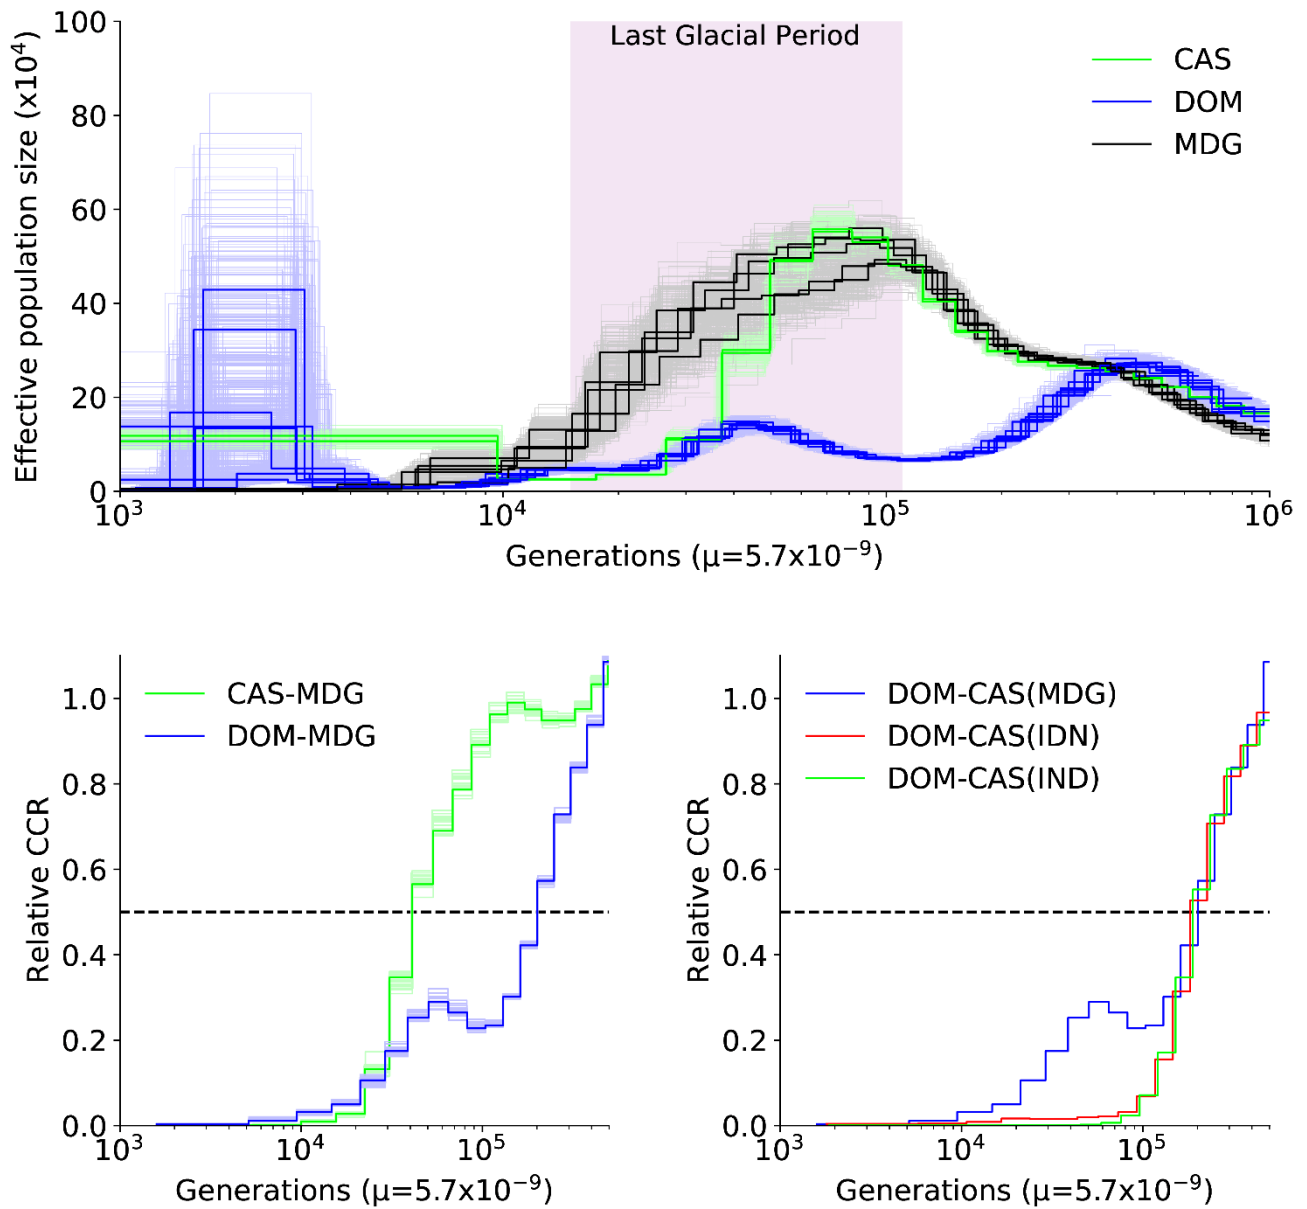

Figure 5.

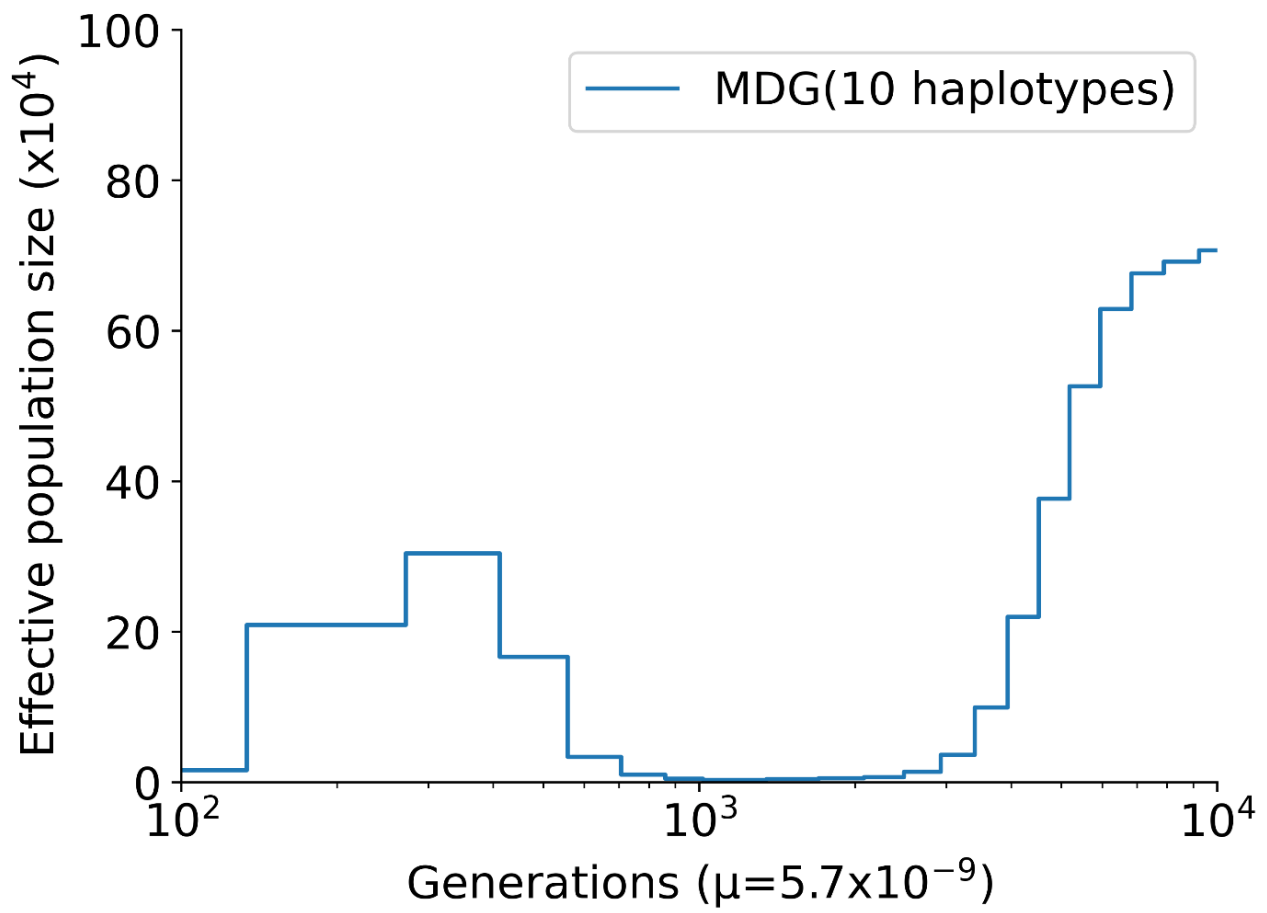

Figure 6.

**Table 1. Basic Statistics of Malagasy House Mouse Samples**

| Sample Code | Sample ID | Location               | mtDNA Haplogroup | Median Coverage | Ts/Tv | Per-Sample Nucleotide Diversity | Nonsynonymous | Synonymous | Nonsynonymous/Synonymous |
|-------------|-----------|------------------------|------------------|-----------------|-------|---------------------------------|---------------|------------|--------------------------|
| MDG01       | HS5555    | Madagascar: Tsimbazaza | GEN              | 26.0            | 2.107 | 0.003091476                     | 85684         | 209312     | 0.40936019               |
| MDG02       | HS5558    | Madagascar: Tsimbazaza | GEN              | 27.0            | 2.099 | 0.003602944                     | 88291         | 216901     | 0.407056676              |
| MDG03       | HS5559    | Madagascar: Tsimbazaza | GEN              | 27.0            | 2.104 | 0.003338113                     | 85936         | 214002     | 0.401566341              |
| MDG04       | HS5560    | Madagascar: Tsimbazaza | GEN              | 27.0            | 2.107 | 0.002250803                     | 81478         | 199493     | 0.408425358              |
| MDG05       | HS5561    | Madagascar: Tsimbazaza | GEN              | 26.0            | 2.104 | 0.003375003                     | 87030         | 215782     | 0.403323725              |

**Table 2. The estimated demographic parameters.**

| Parameter                                             | CAS - Madagascar            | DOM - Madagascar            |
|-------------------------------------------------------|-----------------------------|-----------------------------|
| $N_{\text{Ancestor}}$                                 | 940,229 (951,825 - 957,181) | 970,580 (980,184 - 985,150) |
| $N_{\text{CAS}}$                                      | 243,144 (241,141 - 246,463) |                             |
| $N_{\text{DOM}}$                                      |                             | 74,307 (73,775 - 74,965)    |
| $N_{\text{MDG}}$                                      | 117,614 (117,387 - 119,603) | 107,180 (106,976 - 108,607) |
| $T_{\text{DIV}}$                                      | 98,513 (98,102 - 100,417)   | 113,861 (112,941 - 115,220) |
| $N_{\text{MDG}m_{\text{MDG} \rightarrow \text{CAS}}}$ | 0.0045 (0.0064 - 0.0129)    |                             |
| $N_{\text{MDG}m_{\text{MDG} \rightarrow \text{DOM}}}$ |                             | 0.0005 (0.0009 - 0.0022)    |
| $N_{\text{CAS}m_{\text{CAS} \rightarrow \text{MDG}}}$ | 0.0400 (0.0334 - 0.0426)    |                             |
| $N_{\text{DOM}m_{\text{DOM} \rightarrow \text{MDG}}}$ |                             | 0.1005 (0.0974 - 0.1008)    |

\*95% bootstrap confidence intervals are shown in the parentheses.
